# Supplementary material
Source: MDPI journal article supplement (https://www.mdpi.com/2571-9408/3/4/74)
Supplement: s1 [file s1]

1 Article

2 **Supplementary Materials: Ag-Nanostars for the**  
3 **Sensitive SERS Detection of Dyes in Artistic**  
4 **Cross-Sections—*Madonna della Misericordia* of the**  
5 **National Gallery of Parma: A Case Study**

6 Maria Sole Zalaffi <sup>1</sup>, Ines Agostinelli <sup>2</sup>, Najmeh Karimian <sup>1</sup> and Paolo Ugo <sup>1,\*</sup>

7 <sup>1</sup> Department of Molecular Sciences and Nanosystems, University Ca' Foscari of Venice, Via Torino 155,  
8 30172 Venezia Mestre, Italy; mariasole.zalaffi@unive.it (M.S.Z.); najmeh.karimian@unive.it (N.K.)

9 <sup>2</sup> Restoration Laboratory of the National Gallery of Parma, Piazzale della Pilotta 15, 43121 Parma, Italy;  
10 ines.agostinelli@beniculturali.it

11 \* Correspondence: ugo@unive.it

12 **1. Extinction Spectrum of AgNSs**

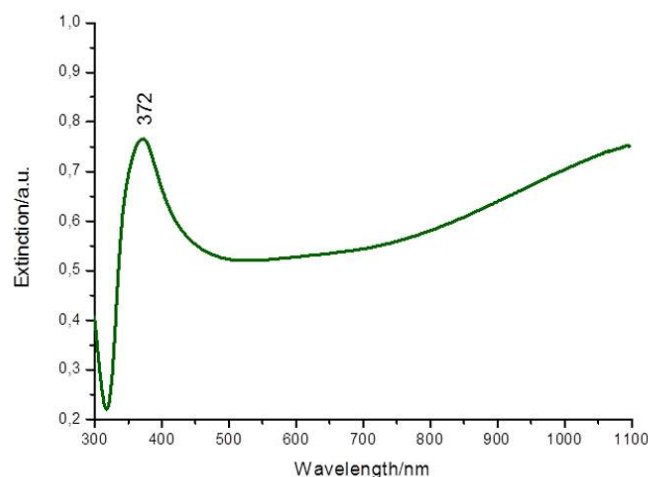

13

14 **Figure SM1.** UV-Vis extinction spectrum of the AgNSs colloid at pH 8.1.

15 **2. *Madonna Della Misericordia*: Visual and Non-Invasive Analyses**

16 As required by the analytical sequence [S1], the first examination of a painting is the visual one.  
17 This analysis revealed many conservation issues (losses of color, woodworm holes, etc.) and  
18 evidence of the past restoration interventions (Japanese paper on cracks, re-paintings, etc.) carried  
19 out in 1896 [S2] and in 1951 [S3] (Figure SM2).

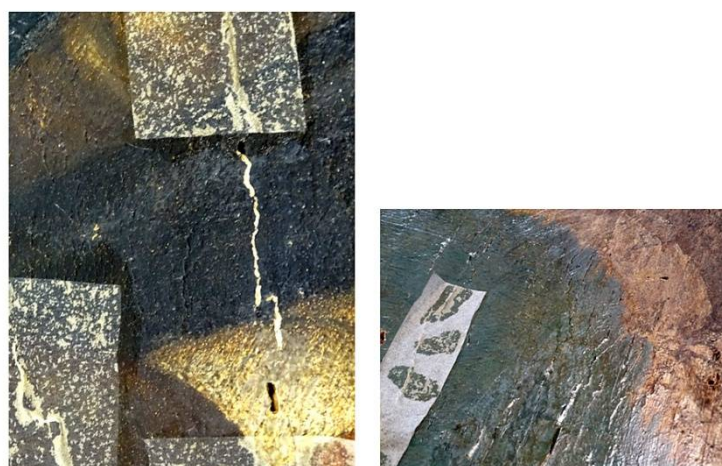

20

21 **Figure SM2.** Picture showing some of the conservation issues of the *Madonna della Misericordia*:  
 22 cracks, losses of color, lifting of the paint layer, woodworm holes.

23 Thereafter, IR reflectography was carried out by using a Hamamatsu vidicon tube camera,  
 24 revealing the presence of well-defined underdrawings. Figure SM3 shows the detail of one of the  
 25 two kneeling ladies: her image was accurately drawn before painting and particular attention was  
 26 given to the pearls of the necklace, her eyes and the voile which covers her hair.

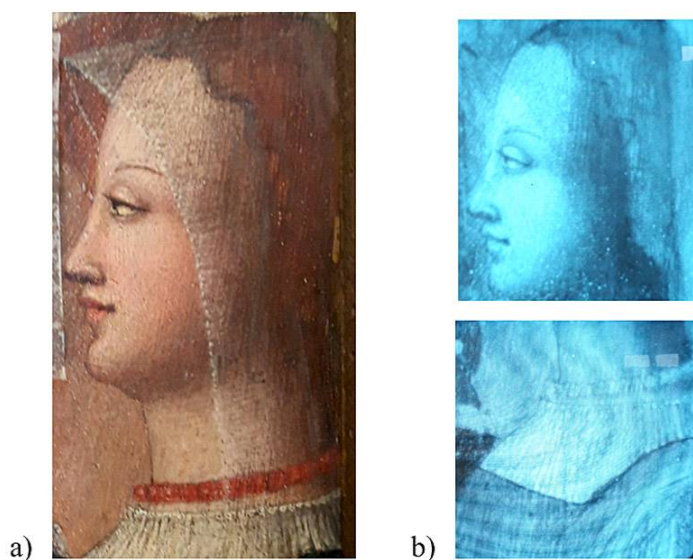

27

28 **Figure SM3.** (a) Detail of one kneeling lady and (b) its IR reflectography image which underlines the  
 29 presence of precise underdrawings (pearls of the necklace, eyes, voile).

30

31 The observation under UV light by a commercial Wood lamp revealed the accurate location of  
 32 many re-paintings which appear darker than the original paint and of a thick layer of restoration  
 33 varnish characterized by the typical yellowish fluorescence [S1] (Figure SM4).

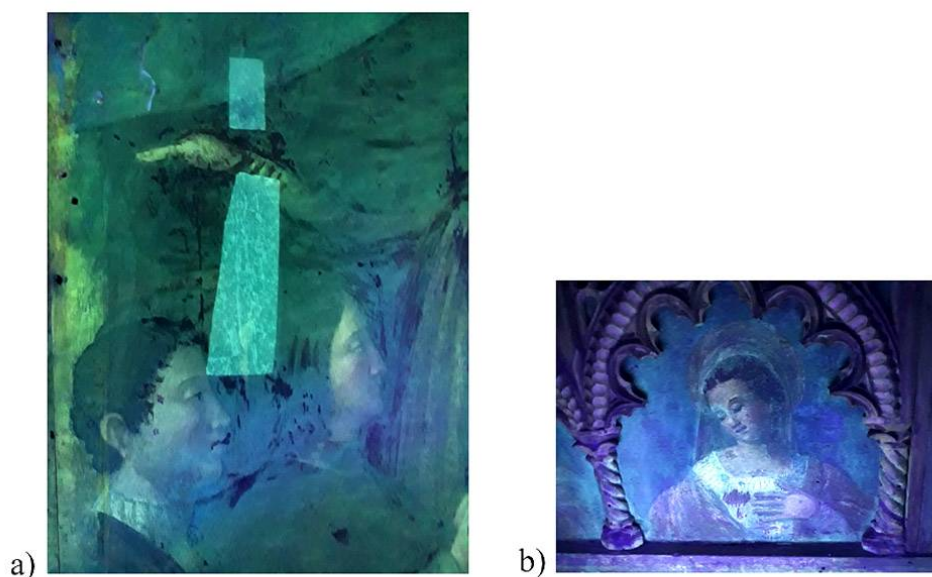

34

35 **Figure 4.** Detail of (a) the two gentlemen and (b) Santa Caterina in the *predella*: several dark areas  
36 indicate the position of re-paintings and the yellowish fluorescence is due to the presence of  
37 restoration varnish.

38 After these assays, some areas of interest of the painting were examined by optical microscopy  
39 in reflected light. The repainted details were easily recognized by examining the different kinds of  
40 *craquelure*: the original paint shows an homogeneous network of shell-like cracks (Figure SM5-a)  
41 while the retouched details, plastered and repainted, present a scratched surface to mimic the aged  
42 pictorial layer [S1] (Figure SM5-b).

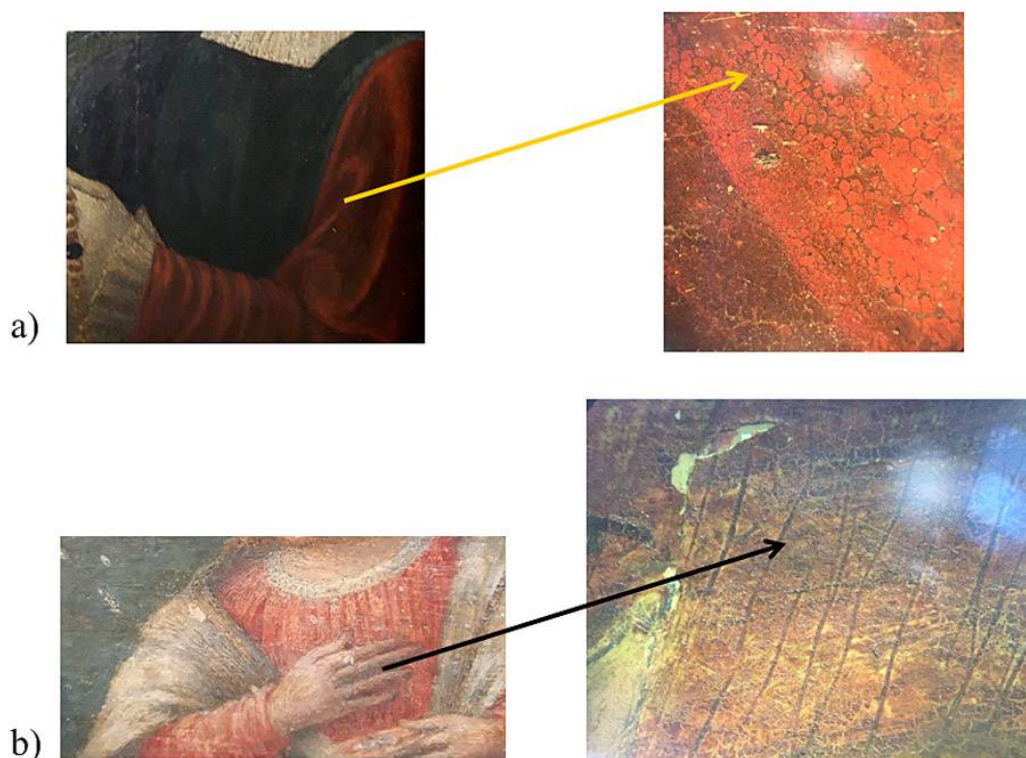

43

44 **Figure SM5.** Craquelure of a) the original pictorial layer characterized by shell-like cracks and of b) a  
 45 plastered detail where the ageing of the paint layer was simulated by scratches.

### 46 3. Raman Spectral Data for Copper Alpha-Phthalocyanine PB 15:2

47 **Table S1.** Comparison of the experimental and reference spectral bands (s: strong; m: medium;  
 48 w: weak) of copper alpha-phthalocyanine PB 15:2 [S4], [S5].

| Experimental SERS bands (cm <sup>-1</sup> ); present work | Literature reference bands (cm <sup>-1</sup> ) [S4, S5] | Attribution                                                                             |
|-----------------------------------------------------------|---------------------------------------------------------|-----------------------------------------------------------------------------------------|
| 1566 (m)                                                  |                                                         |                                                                                         |
| 1514 (s)                                                  | 1518 (s)                                                | Out-of-phase stretching of the CNC bridges                                              |
| 1438 (w)                                                  | 1446 (m)                                                | Out-of-phase benzene rings deformations                                                 |
| 1400 (w)                                                  |                                                         |                                                                                         |
| 1379 (m)                                                  |                                                         | Out-of-phase indole rings expansion and benzene rings deformations                      |
| 1343 (s)                                                  | 1334 (s)                                                | In-phase Cu-N stretches/ indole and benzene ring deformations                           |
| 1303 (m)                                                  | 1303 (w)                                                |                                                                                         |
|                                                           | 1181 (w)                                                |                                                                                         |
| 1142 (w)                                                  | 1140 (m)                                                | Out-of-phase expansions of both the indole and benzene rings.                           |
| 1104 (s)                                                  | 1105 (w)                                                | In-phase stretches of the Cu-N bonds/indole rings deformations/benzene rings expansions |
| 1002 (m)                                                  | 1005 (w)                                                | In-phase expansions of the benzene rings                                                |
| 720 (m)                                                   | 745 (s)                                                 | Out-of-phase deformations of the indole groups                                          |

|         |         |                                                                                              |
|---------|---------|----------------------------------------------------------------------------------------------|
| 679 (m) | 679 (m) | Symmetric stretches of the four CNC bridges/<br>deformations in the indole and benzene rings |
| 649 (m) |         |                                                                                              |
| 585 (w) | 592 (w) |                                                                                              |
| 479 (w) | 483 (m) |                                                                                              |
|         | 255 (w) | Ring breathing                                                                               |

49

#### 50 4. Summary of the Results Obtained from the Analysis of Each Cross-Section

51 In order to make the description of the obtained results clearer, a brief summary of the detected  
52 materials in each cross section is presented in Table S2.

53 **Table S2.** Summary of the material identified in the cross sections sampled from the *Madonna della*  
54 *Misericordia*.

| Sample                                                                                                                                        | Analytical technique(s)                                        | Composition                                                                                                                  |
|-----------------------------------------------------------------------------------------------------------------------------------------------|----------------------------------------------------------------|------------------------------------------------------------------------------------------------------------------------------|
| CS1- upper left part of the bluish background<br>           | Optical microscopy,<br>SEM-EDS, Raman<br>spectroscopy and SERS | Preparation: gypsum<br>1 <sup>st</sup> paint layer: azurite and lead<br>white<br>2 <sup>nd</sup> paint layer: titanium white |
| CS2- bluish background in the<br><i>predella</i><br>       | Optical microscopy,<br>SEM-EDS, Raman<br>spectroscopy and SERS | Preparation: gypsum<br>Paint layer: titanium white,<br>copper alpha-phtalocyanine,<br>ultramarine blue                       |
| CS3- Virgin Mary's blue mantle<br>                         | Optical microscopy,<br>SEM-EDS, Raman<br>spectroscopy          | Preparation: gypsum<br>Paint layer: azurite, iron oxides<br>and lead white                                                   |
| CS4- Santa Lucia's red tunic in the<br><i>predella</i><br> | Optical microscopy,<br>SEM-EDS, Raman<br>spectroscopy          | Preparation: gypsum<br>Paint layer: vermilion                                                                                |
| CS5- client's red sleeve<br>                               | Optical microscopy,<br>SEM-EDS, Raman<br>spectroscopy          | Preparation: gypsum<br>Paint layer: vermilion                                                                                |
| CS6- client's white bonnet                                                                                                                    | Optical microscopy,<br>SEM-EDS, Raman                          | Preparation: gypsum<br>Paint layer: lead white                                                                               |

|                                                                                                                                    |                                                          |                                                                                                                                                                                                                                 |
|------------------------------------------------------------------------------------------------------------------------------------|----------------------------------------------------------|---------------------------------------------------------------------------------------------------------------------------------------------------------------------------------------------------------------------------------|
|                                                   | spectroscopy                                             |                                                                                                                                                                                                                                 |
| CS7- left lower part of the bluish background<br> | Optical microscopy, SEM-EDS, Raman spectroscopy and SERS | 1 <sup>st</sup> preparation: gypsum<br>1 <sup>st</sup> paint layer: azurite and lead white<br>2 <sup>nd</sup> preparation: gypsum<br>2 <sup>nd</sup> paint layer: titanium white, copper alpha -phtalocyanine, ultramarine blue |
| CS1F- beige decoration<br>                        | Optical microscopy, SEM-EDS, Raman spectroscopy          | Preparation: gypsum<br>Paint layer: lead white                                                                                                                                                                                  |
| CS2F- greenish decoration<br>                     | Optical microscopy, SEM-EDS, Raman spectroscopy and SERS | Preparation: gypsum<br>Paint layer: titanium white and copper alpha -phtalocyanine                                                                                                                                              |
| CS3F- green decoration<br>                      | Optical microscopy, SEM-EDS, Raman spectroscopy and SERS | Preparation: gypsum<br>1 <sup>st</sup> red paint layer: red lead<br>2 <sup>nd</sup> green paint layer: copper alpha -phtalocyanine                                                                                              |
| CS4F- bluish decoration<br>                     | Optical microscopy, SEM-EDS, Raman spectroscopy          | Paint layer: supposed Scheele's green                                                                                                                                                                                           |
| CS6F- bluish decoration<br>                     | Optical microscopy, SEM-EDS, Raman spectroscopy          | Paint layer: supposed Scheele's green                                                                                                                                                                                           |

55

## 56 References

- 57 [S1] Pinna D., Galeotti M., Mazzeo R., *Scientific examination for the investigation of paintings. A handbook for*  
58 *restorers* 2011, Centro Di Firenze, Italy.
- 59 [S2] Ricci C., *La R. Galleria di Parma* 1896, L. Battei, Parma.
- 60 [S3] Fornari-Schianchi L., *Galleria Nazionale di Parma, Catalogo delle opere dall'antico al Cinquecento* 1997,  
61 F.M. Ricci, Milano.
- 62 [S4] Scherrer N.C., Zumbuehl S., Delavy F., Fritsch A., Kuehnen R., *Synthetic*

63 organic pigments of the 20th and 21st century relevant to artist's paints: Raman  
64 spectra reference collection. Spectrochim. Acta A 2009, 73, 505-524. [DOI:  
65 10.1016/j.saa.2008.11.029]  
66 [S5] Tackley D.R., Dent G., Smith W.E., IR and Raman assignments for zinc  
67 phthalocyanine from DFT calculations. Phys. Chem. Chem. Phys., 2000, 3949-3955.  
68 [DOI: 10.1039/b0050911]  
69

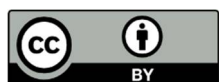

© 2020 by the authors. Submitted for possible open access publication under the terms and conditions of the Creative Commons Attribution (CC BY) license (<http://creativecommons.org/licenses/by/4.0/>).

70
